# Supplementary material for: Quick Decline Disease Disturbs the Levels of Important Phytochemicals and Minerals in the Stem Bark of Mango (Mangifera indica)
Source: Hindawi journal article supplement (doi:10.1155/2016/8219356), 2016-01-01
Supplement: f1 [file 8219356.f1.pdf]

**Table S1:** Primary metabolites (Nutrients) in (g/ 100g) of healthy and infected stem bark of mango suffering from quick decline

| Nutrients       | Healthy Stem Bark | Infected Stem Bark | P-Value |
|-----------------|-------------------|--------------------|---------|
| Total Sugars    | 0.934±0.032       | 0.81±0.062         | 0.037*  |
| Reducing Sugars | 0.725±0.087       | 0.631±0.069        | 0.217   |
| Protein         | 1.233±0.146       | 2.56±0.218         | 0.000*  |
| Ascorbic Acid   | 0.337±0.044       | 0.322±0.035        | 0.665   |
| Free Amino Acid | 0.563±0.085       | 0.526±0.044        | 0.536   |

\* Significant difference

**Table S2:** Secondary metabolites in (g/ 100g) of healthy and infected stem bark of mango suffering from quick decline

| Phytochemicals | Healthy Stem Bark | Infected Stem Bark | P-Value |
|----------------|-------------------|--------------------|---------|
| Phenol         | 0.22±0.062        | 0.3±0.089          | 0.271   |
| Tannins        | 0.74±0.089        | 0.58±0.062         | 0.063   |
| Flavonoids     | 0.38±0.07         | 0.46±0.089         | 0.288   |
| Alkaloids      | 0.26±0.082        | 0.19±0.062         | 0.304   |

**Table S3:** Mineral contents in the healthy and infected stem bark of mango suffering from quick decline

| Type                  | Nutrients | Healthy        | Infected       | P-Value |
|-----------------------|-----------|----------------|----------------|---------|
| <b>Micronutrients</b> | Fe (µg/g) | 31.333±2.082   | 27±2.646       | 0.089   |
|                       | Zn (µg/g) | 0.68±0.044     | 0.517±0.032    | 0.006*  |
|                       | Ni (µg/g) | 0.307±0.031    | 0.8±0.044      | 0.000*  |
|                       | Pb (µg/g) | 0.06±0.003     | BD             | -----   |
|                       | Cu (µg/g) | 2.637±0.456    | 2.067±0.321    | 0.151   |
|                       | Cr (µg/g) | 2±0.436        | 0.147±0.025    | 0.001*  |
|                       | B (µg/g)  | 1.8±0.173      | 1.533±0.208    | 0.163   |
|                       | Mo (µg/g) | BD             | BD             | -----   |
|                       | Se (µg/g) | 0.923±0.059    | 0.85±0.036     | 0.139   |
|                       | Na (µg/g) | 5.333±0.07     | 2.383±0.071    | 0.000*  |
|                       | Mn (µg/g) | 1.467±0.153    | 1.533±0.153    | 0.621   |
|                       | Al (µg/g) | 21.333±2.887   | 20.333±2.887   | 0.693   |
|                       | Cd (µg/g) | 0.008±0.002    | 0.047±0.055    | 0.288   |
|                       | Cl (µg/g) | 350±5.292      | 85±5.568       | 0.000*  |
| <b>Macronutrients</b> | N (%)     | 2000±30        | 4000±200       | 0.000*  |
|                       | P (%)     | 6033.33±305.51 | 9133.33±321.46 | 0.000*  |
|                       | K (µg/g)  | 274.33±4.04    | 252.67±4.16    | 0.003*  |
|                       | Ca (µg/g) | 562.67±1.53    | 421±2.65       | 0.000*  |
|                       | Mg (µg/g) | 34.33±3.21     | 47±3.61        | 0.010*  |

BD: Below detection limit; \* Significant difference

**Table S4:** Ash contents (%) in healthy and infected stem bark of mango suffering from quick decline

| Ash Value       | Healthy Stem Bark | Infected Stem Bark | P-Value |
|-----------------|-------------------|--------------------|---------|
| Total Ash       | 1.73±0.026        | 2.887±0.031        | 0.000*  |
| Water Soluble   | 0.75±0.026        | 0.93±0.02          | 0.000*  |
| Water Insoluble | 0.98±0.02         | 1.957±0.025        | 0.000*  |

\* Significant difference
